# Supplementary material
Source: publisher figshare collection journal article supplement (https://gsapubs.figshare.com/articles/dataset/_/12535637)
Supplement: Supplementary file 1 [file 1]

GSA Data Repository Item 2017330

Saccani, E., Dilek, Y., and Photiades, A., 2017, Time-progressive mantle-melt evolution and magma production in a Tethyan marginal sea: A case study of the Albanide-Hellenide ophiolites: Lithosphere, doi:10.1130/L602.1

2017330\_Tables DR1-DR5.xls
